# Supplementary material for: Ursolic acid inhibits NF-κB signaling and attenuates MMP-9/TIMP-1 in progressive osteoarthritis: a network pharmacology-based analysis
Source: Royal Society of Chemistry journal article supplement (doi:10.1039/d4ra02780a), 2024-01-01
Supplement: d4ra02780a1.pdf [file d4ra02780a1.pdf]

## Supplementary Material

### **Ursolic acid inhibits NF-κB signaling and attenuates MMP-9/TIMP-1 in progressive osteoarthritis: A network pharmacology-based analysis**

Eman Maher Zahran<sup>a\*</sup>, Soad A. Mohamad<sup>b</sup>, Mohamed M. Elsayed<sup>c</sup>, Mohamed Hisham<sup>d</sup>, Sherif A. Maher<sup>e</sup>, Usama Ramadan Abdelmohsen<sup>a,f</sup>, Mahmoud Elrehany<sup>h</sup>, Samar Yehia Desoukey<sup>f</sup>, Mohamed Salah Kamel<sup>f</sup>

<sup>a</sup>Department of Pharmacognosy, Faculty of Pharmacy, Deraya University, Universities Zone, New Minia City, 61111, Egypt. <https://orcid.org/0000-0002-5517-082X>.

<sup>b</sup>Department of Pharmaceutics and Clinical Pharmacy, Faculty of Pharmacy, Deraya University, Universities Zone, New Minia City, 61111, Egypt.

<sup>c</sup>Faculty of Pharmacy, Deraya University, Universities Zone, New Minia City, 61111, Egypt.

<sup>d</sup>Department of Pharmaceutical Chemistry, Faculty of Pharmacy, Deraya University, Universities Zone, New Minia City, 61111, Egypt

<sup>e</sup>Department of Biochemistry, Faculty of Pharmacy, New Valley University, New Valley, 72713, Egypt

<sup>f</sup>Department of Pharmacognosy, Faculty of Pharmacy, Minia University, 61519 Minia, Egypt

<sup>g</sup>Department of Pharmacognosy, College of Pharmacy, King Khalid University, Abha 62521, Saudi Arabia [mrabeh@kku.edu.sa](mailto:mrabeh@kku.edu.sa) , [Salshhri@kku.edu.sa](mailto:Salshhri@kku.edu.sa)

<sup>h</sup> Department of Biochemistry, Faculty of Pharmacy, Deraya University, Universities Zone, New Minia City, 61111, Egypt

**\*Corresponding author:** Eman Maher Zahran, [emanzahran84@yahoo.com](mailto:emanzahran84@yahoo.com), [eman.maher@deraya.edu.eg](mailto:eman.maher@deraya.edu.eg),

34 1. **Metabolic profiling of n-hexane fraction of *Ocimum forskolei* and isolation of**  
35 **ursolic acid**

36 LC-MS was carried out using a mass spectrometer of Synapt G2 HDMS quadrupole time-of-  
37 flight hybrid (Waters, Milford, CT, USA). A two ml of the sample was injected into a BEH  
38 C18 column (2.1 × 50 mm), which was optimized to 40° C, and then connected to the guard  
39 column. The gradient elution was employed, where the mobile phase consisted of purified  
40 water (A) and acetonitrile (B) containing 0.1% formic acid in each. The gradient program  
41 started with 10% B which was increased linearly in 30 min to 100% B at a flow rate of 300  
42 µL/min and remained isocratic for 5 min before linearly decreasing to 10% B in 1 min. The  
43 injection volume was adjusted at to 10 µL, the tray temperature was maintained at 12° C with  
44 a total analysis time of 45 min. for each sample. High resolution mass spectrometry was carried  
45 out in both positive and negative ESI ionization modes with a spray voltage of 4.5 kV, a  
46 capillary temperature of 320° C and a mass range acquired at m/z from 150 to 1500. The  
47 MZmine 2.12 was employed for investigation of data, followed by converting the raw data into  
48 positive and negative files in mzML format with ProteoWizard. The compounds were then  
49 dereplicated and identified using the Dictionary of Natural Products (DNP) database <sup>1</sup>.

50 The n-hexane fraction (400 mg) was subjected to VLC fractionation on a silica gel column using n-  
51 hexane-EtOAc gradient mixtures of increasing polarities (20, 30, 40, 50 and 100%). The effluents  
52 were collected in fractions which were concentrated to give four subfractions (II 1-II 4). Subfraction  
53 II 4 (70 mg) was subjected to silica gel column using DCM-MeOH gradient mixtures where a white  
54 powder was precipitated and purified. Then, it was dissolved in DMSO-d<sub>6</sub>, at a concentration of 1  
55 mg/500 µl of DMSO-d<sub>6</sub>, and subjected to <sup>1</sup>H-NMR analysis *via* a Brüker Avance, 400 MHz, NMR  
56 spectrometer, Germany), using Tetramethyl Silane (TMS) as a reference. This was followed by co-  
57 chromatography in comparison with an authentic ursolic acid sample obtained from pharmacognosy  
58 department, faculty of pharmacy, Deraya university. The run system used for TLC co-  
59 chromatography was DCM:Methanol 95:5 and the R<sub>f</sub> values were measured.

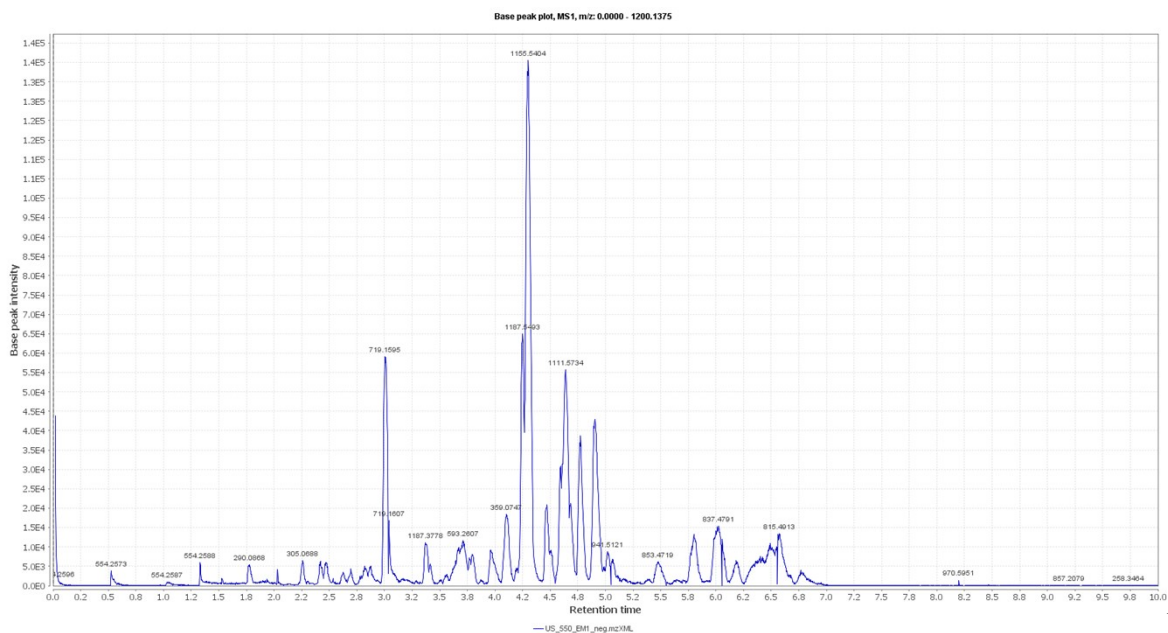

60

Fi

61

**Figure S1:** LC-HR-MS chromatogram of n-hexane fraction of *Ocimum forskolei*; negative mood

62

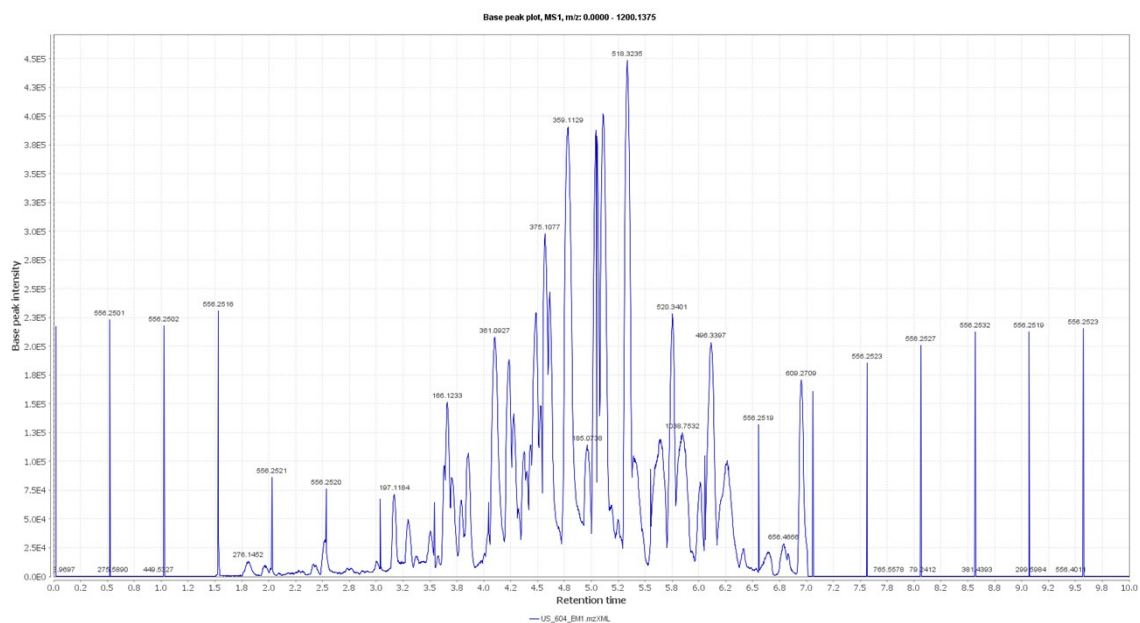

63

**Figure S2:** LC-HR-MS chromatogram of n-hexane fraction of *Ocimum forskolei*; positive mood

65

**Table S1.** Dereplicated metabolites from LC-HR-MS analysis of n-hexane fraction of *Ocimum forskolei*

67

| No. | Compound | Acc. Mass<br>g/mol | $m/z$ | Mol.<br>formula | Chemical<br>class | Ref |
|-----|----------|--------------------|-------|-----------------|-------------------|-----|
|-----|----------|--------------------|-------|-----------------|-------------------|-----|

|    |                                         |        |         |                                                                  |                           |    |
|----|-----------------------------------------|--------|---------|------------------------------------------------------------------|---------------------------|----|
| 1  | 4-hexenoic acid                         | 114.07 | 114.011 | C <sub>6</sub> H <sub>10</sub> O <sub>2</sub>                    | Fatty acid                | 2  |
| 2  | Fumaric acid                            | 116.01 | 116.013 | C <sub>4</sub> H <sub>4</sub> O <sub>4</sub>                     | Fatty acid                | 3  |
| 3  | Dihydroxybenzoic acid                   | 154.03 | 153.011 | C <sub>7</sub> H <sub>5</sub> O <sub>4</sub>                     | Phenolic compound         | 4  |
| 4  | Eugenol                                 | 164.08 | 164.082 | C <sub>10</sub> H <sub>12</sub> O <sub>2</sub>                   | Phenolic compound         | 5  |
| 5  | Vanillic acid                           | 168.04 | 168.005 | C <sub>8</sub> H <sub>7</sub> O <sub>4</sub>                     | Phenolic compound         | 6  |
| 6  | Ligustilidiol                           | 224.10 | 224.104 | C <sub>12</sub> H <sub>16</sub> O <sub>4</sub>                   | Iridoid                   | 7  |
| 7  | 12-hydroxy jasmonic acid                | 226.12 | 226.113 | C <sub>12</sub> H <sub>18</sub> O <sub>4</sub>                   | Cyclopentanone derivative | 8  |
| 8  | Sacidumol A                             | 236.10 | 236.104 | C <sub>13</sub> H <sub>16</sub> O <sub>4</sub>                   | Phenolic compound         | 9  |
| 9  | Nigellicine                             | 246.10 | 246.109 | C <sub>13</sub> H <sub>14</sub> N <sub>2</sub><br>O <sub>3</sub> | Heterocyclic compound     | 10 |
| 10 | 2-Hydroxy-9,12,15-octadecatrienoic acid | 294.46 | 294.467 | C <sub>18</sub> H <sub>30</sub> O <sub>3</sub>                   | Fatty acid                | 11 |
| 11 | Sanguinone A                            | 298.11 | 298.004 | C <sub>15</sub> H <sub>14</sub> N <sub>4</sub><br>O <sub>3</sub> | Pyrroloquinoline alkaloid | 12 |
| 12 | Synparvolide C                          | 300.12 | 300.120 | C <sub>14</sub> H <sub>20</sub> O <sub>7</sub>                   | Heterocyclic compound     | 13 |
| 13 | Aegyptinone A                           | 310.16 | 310.157 | C <sub>20</sub> H <sub>22</sub> O <sub>3</sub>                   | Heterocyclic compound     | 14 |
| 14 | Scillascillin                           | 312.06 | 312.062 | C <sub>17</sub> H <sub>12</sub> O <sub>6</sub>                   | Homoisoflavanone          | 15 |
| 15 | Sahandone                               | 324.21 | 324.187 | C <sub>21</sub> H <sub>26</sub> O <sub>3</sub>                   | Diterpene                 | 16 |

|    |                                                  |        |         |                                                |                   |    |
|----|--------------------------------------------------|--------|---------|------------------------------------------------|-------------------|----|
| 16 | 5-O-Caffeoyl shikimic acid                       | 336.08 | 336.084 | C <sub>16</sub> H <sub>16</sub> O <sub>8</sub> | Phenolic compound | 17 |
| 17 | 5-O-p-Coumaroyl quinic acid                      | 338.10 | 338.099 | C <sub>16</sub> H <sub>18</sub> O <sub>8</sub> | Phenolic compound | 18 |
| 18 | 3-(3,4-Dihydroxyphenyl)-2-hydroxy propanoic acid | 360.08 | 360.082 | C <sub>18</sub> H <sub>16</sub> O <sub>8</sub> | Phenolic compound | 19 |
| 19 | Ursolic acid                                     | 456.36 | 456.129 | C <sub>30</sub> H <sub>48</sub> O <sub>3</sub> | Triterpene        | 20 |

68

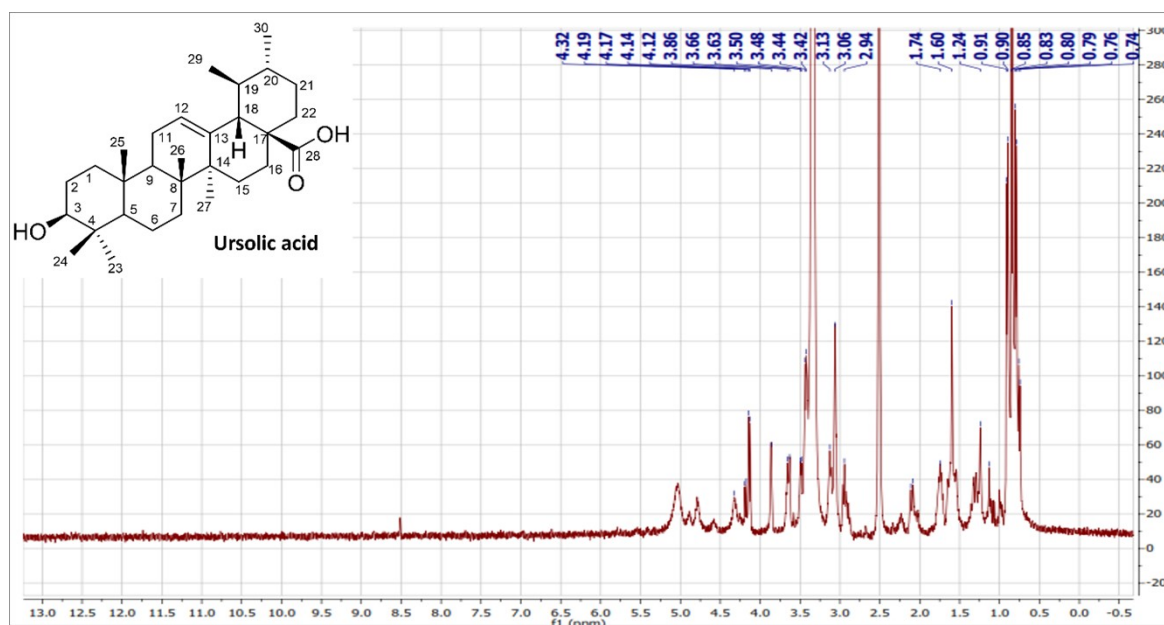

69

70

A

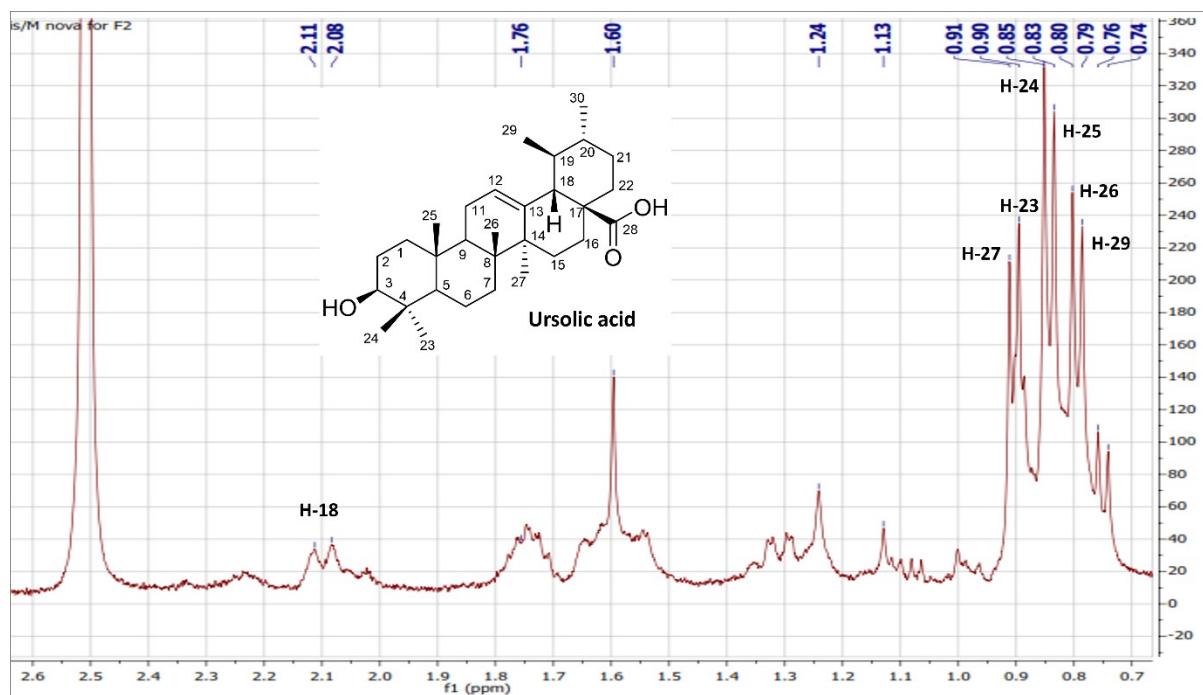

71

72

B

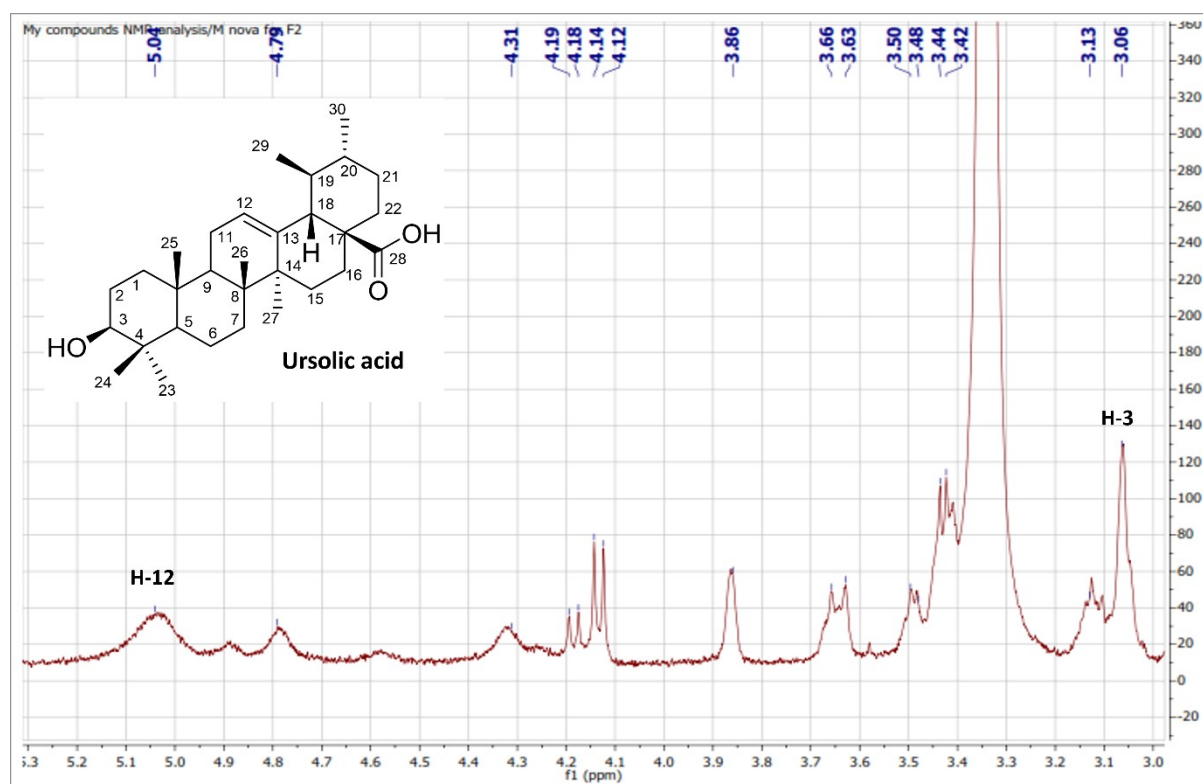

73

74

C

75 **Figure S3 A, B & C Integrated  $^1\text{H-NMR}$  spectra of Ursolic acid (DMSO- $d_6$ , 400 MHz)**

76 **Table S2. A list of  $^1\text{H-NMR}$  chemical shifts of ursolic acid**

| Assignment | Chemical shift<br>$\delta_H$ | Integration, Multiplicity & <i>J</i><br>(Hz) |
|------------|------------------------------|----------------------------------------------|
| H-3        | 3.06                         | 1H, s                                        |
| H-12       | 5.04                         | 1H, br s                                     |
| H-18       | 2.10                         | 1H, d, <i>J</i> = 11 Hz                      |
| H-23       | 0.90                         | 3H, s, CH <sub>3</sub>                       |
| H-24       | 0.85                         | 3H, s, CH <sub>3</sub>                       |
| H-25       | 0.83                         | 3H, s, CH <sub>3</sub>                       |
| H-26       | 0.80                         | 3H, s, CH <sub>3</sub>                       |
| H-27       | 0.91                         | 3H, s, CH <sub>3</sub>                       |
| H-29       | 0.79                         | 3H, d, <i>J</i> = 6.4 Hz                     |
| H-30       | 0.85                         | 3H, d, <i>J</i> = 6 Hz                       |

77

## 78 2. Formulation of UA emulgel

79 Poloxamer, chitosan, PVA were purchased from Merck chemicals, USA. Ltd, Olive oil and  
80 lecithin from Sigma-Aldrich, USA, methanol from Sigma- Aldrich, Germany and glycerol  
81 from Ranbaxy laboratories Ltd. Three different formulations: UAE1, UAE2 and UAE3 were  
82 prepared by dissolving the defined amount of the drug in ethanol and lecithin then mixed with  
83 5 ml of Olive oil, followed by addition of the surfactant and co-surfactant in well closed tubes  
84 for 24 hrs on magnetic stirrer at 200 rpm (75° C) and finally centrifugating the suspension at  
85 5000 rpm (Figure S. Clear supernatant liquid was separated and filtered, then the absorbance  
86 was measured by a UV spectrophotometer (Shimadzu UV-1280, Japan) at 214 nm. The  
87 resulting emulsion was then cooled at room temperature by immersion in a thermostatic bath  
88 (10.0±0.1°C).<sup>21, 22</sup>

89

90 **Table S3:** Composition of different formulations of UA

| Components                               | UA-E1     | UA-E2     | UA-E3     |
|------------------------------------------|-----------|-----------|-----------|
| UA                                       | 2% w/w    | 2% w/w    | 2% w/w    |
| Poloxamer                                | 25% w/w   | -         | -         |
| PVA                                      | -         | -         | 25% w/w   |
| Chitosan (in 1% v/v glacial acetic acid) | -         | 25% w/w   | -         |
| Olive oil                                | 20% w/w   | 20% w/w   | 20% w/w   |
| Lecithin                                 | 7.5% w/w  | 7.5% w/w  | 7.5% w/w  |
| Glycerol                                 | 2.5% w/w  | 2.5% w/w  | 2.5% w/w  |
| Water                                    | q.s. 100% | q.s. 100% | q.s. 100% |

91

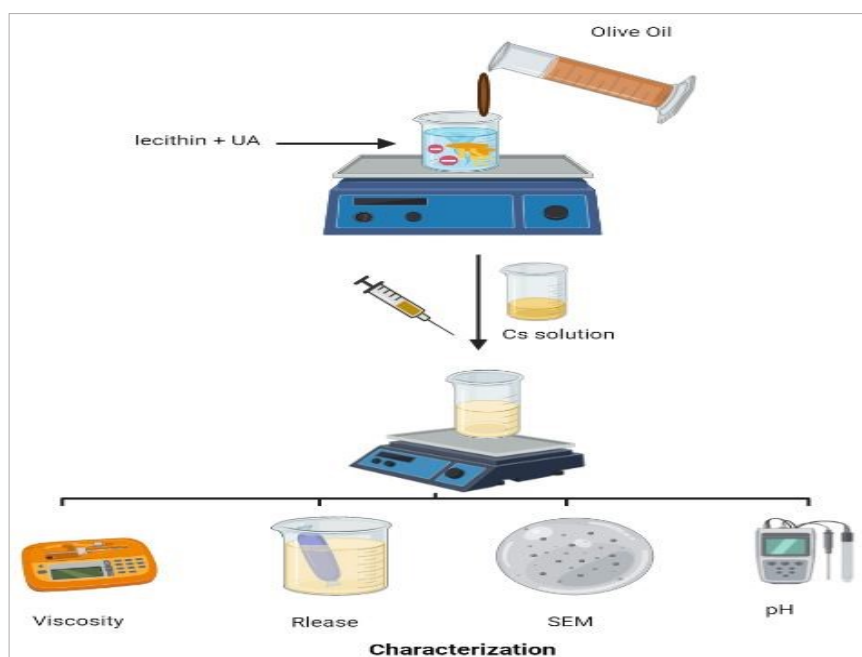

92

93

94

**Figure S4:** A schematic presentation for preparation steps of the emulgel



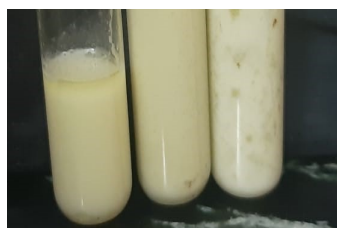

A B C

**Figure S5.** UA formulations: (A) UAE1, B) UAE2 and C) UA-E3

**Table S4. physical examination of the three formulations**

| Formulation     | Color               | Odor                     | Grittiness | Phase separation | Homogeneity |
|-----------------|---------------------|--------------------------|------------|------------------|-------------|
| <b>Emulsion</b> | White               | pungent, fruity<br>smell | -ve        | None             | Homogenous  |
| <b>UAE1</b>     | Light green         | pungent, fruity<br>smell | -ve        | Slight           | Homogenous  |
| <b>UAE2</b>     | White               | pungent, fruity<br>smell | -ve        | None             | Homogenous  |
| <b>UAE3</b>     | Dull light<br>green | pungent, fruity<br>smell | -ve        | Separated        | Slight      |

99

### 100 3. Characterization of the UA emulgel

101 The drug content (D.C.) was assessed based on the following equation:

102 • **Drug content** =  $(C \times D.F \times V) \times C.F$  .....**Equation 1**

103 Where; **C**, Concentration, **D.F**, Dilution factor, **V**, Volume taken and **C.F**, Conversion factor.

104 Additionally, 1 gram of each formulation was taken in a porous aluminum foil and placed  
 105 separately in a 50 ml beaker containing 10 ml of 0.1 N NaOH, for measuring the swelling index  
 106 (S) according to the equation:

107 
$$S\% = \frac{W_t - W_0}{W_0} \times 100 \dots\dots\dots\text{Equation 2}$$

108  $W_t$  = Weight of swollen emulgel after time t,  $W_0$  = Original weight of emulgel at zero time.

109 Moreover, 0.25g of each formulation was enclosed in a dry test tube and observed over a  
 110 temperature range of 2–50°C, where the temperature was changed gradually (5°C/h) to  
 111 measure gelation temperature <sup>23</sup>.

112 • **The bioadhesion measurement**

113 The bioadhesion measurement was performed using the modified Jolly balance method, to  
 114 rationalize the mucoadhesion characteristics of the optimized emulgel <sup>24</sup>, using the following  
 115 equation:

116 
$$\text{Bioadhesion force (N)} = \frac{\text{Bioadhesive strength}}{1000} \times 9.81 \dots\dots\dots\text{Equation 3}$$

117 • **The centrifugation test**

118 In addition, the centrifugation test used to check the stability of the emulgel was performed by  
 119 centrifugation of 5 g of UAE2 at 5000 rpm for 10 min at temperature of 25°C, then visually  
 120 observing any signs of creaming or phase separation <sup>25</sup>. Besides, the globule size and  $\zeta$ -  
 121 potential of all formulations were measured by zetasizer (Malvern zetasizer, 90) with the aid  
 122 of a disposable sizing cuvette at 25.1°C, where 1 ml of the sample was diluted with 10 ml water  
 123 and the results were recorded <sup>24</sup>.

124

125 • **The permeation study**

126 As well, the modified Franz diffusion cell was used for permeation study, as reported <sup>26</sup>. where  
 127 the mechanism of UA release from UAE2 was calculated according to the following kinetic  
 128 models <sup>27, 28</sup>:

129 1. Zero order  $R=K_0t$

130 2. First order:  $R = 1 - e^{-k_1t}$

131 3. Higuchi diffusion model:  $Q = K^H \times t^{1/2}$

132 4. Baker–Lonsdale model:  $3/2[1 - (1 - M_t/M_\infty)^{2/3}] - M_t/M_\infty = K_3t$

133 5. Hixson–Crowell cube root law:  $\frac{dW}{dt} = KC(C_s - C)$

134 6. Whereas R, Q or  $M_t/M_\infty$  refers to the fraction of drug released at time t, K,  $K_3$  or  $K^H$  is  
135 the rate constant related to each model.

136 • **The scanning electron microscopy**

137 Finally, the morphology and dimensions of the inner oil phase of the UAE2 emulgel were  
138 evaluated by Field Emission Scanning Electron Microscopy (SEM) using an electron high  
139 tension of 5 and 15 kV as reported <sup>29</sup>.

140 **Table S5. Characterization of the three formulations**

| <b>Formulation</b> | <b>Viscosity<br/>(Pa)</b> | <b>pH</b> | <b>Drug<br/>content<br/>(%)</b> | <b>Swelling<br/>index %</b> | <b>Gelation<br/>temperature<br/>(° C)</b> | <b>Bioadhesion<br/>strength (N)</b> |
|--------------------|---------------------------|-----------|---------------------------------|-----------------------------|-------------------------------------------|-------------------------------------|
| <b>UA emulsion</b> | 17±15                     | 7.2±0.2   | 93.2±3                          | -                           | -                                         | -                                   |
| <b>UA-E1</b>       | 250±20                    | 6.8±0.5   | 86.5±5                          | 1.3±0.1                     | 18±0.5                                    | 2.7±0.2                             |
| <b>UA-E2</b>       | 301±33                    | 6±0.2     | 90±7                            | 2±0.23                      | 23±1                                      | 3.8±0.1                             |
| <b>UA-E3</b>       | 240±25                    | 7±0.4     | 67±2                            | 1.7±0.15                    | 15±2                                      | 2.1±1                               |

141

142 **4. The analgesic assessment**

143 The animals were grouped as previously prescribed and formulations were topically applied to  
144 the knee zone. A radiant heat source was used and the rats responses of leg withdrawal was  
145 timely recorded. The time from the start of heat application to leg withdrawal (in seconds) was  
146 taken as the leg withdrawal latency, determined immediately (0), at 5, 10, 15, 30, 45 and up to  
147 60 min and repeated for five times (with an interval of 5 min) where the mean of five readings  
148 was recorded. The intensity of the heat source was fixed *via* a constant voltage-power supply  
149 and a maximum cut-off latency of 15 seconds was optimized to avoid skin damage, where the  
150 maximum possible analgesia (MPA) was calculated <sup>30</sup>.

151 Test reaction time - start reaction time

152 MPA = \_\_\_\_\_

153 15 - start reaction time

154

155 **Table S6. Results of anti-inflammatory activity**

| Group         | Knee joint diameter (mm) |           |           |           |           |           |           |
|---------------|--------------------------|-----------|-----------|-----------|-----------|-----------|-----------|
|               | Time 0                   | 30 m      | 1 h       | 2 h       | 4 h       | 6 h       | 8 h       |
| Control       | 7.22±0.09                | 7.31±0.07 | 7.38±0.05 | 7.8±0.15  | 8.18±0.12 | 8.78±0.16 | 9.3±0.06  |
| Plain emulgel | 7.85±0.05                | 7.96±0.09 | 8.04±0.12 | 8.33±0.06 | 8.47±0.06 | 8.77±0.15 | 9.31±0.11 |
| UA-emugel     | 8.00±0.03                | 6.95±0.11 | 6.48±0.1  | 5.90±0.1  | 5.29±0.1  | 4.53±0.03 | 4.60±0.1  |
| Algason       | 8.04±0.03                | 7.66±0.11 | 6.74±0.02 | 6.52±0.11 | 5.70±0.13 | 5.26±0.04 | 4.72±0.15 |

156 Each value represents the mean ± SD (N = 6). Statistical analysis were done by One-way

157 ANOVA followed by the student's T-test (\*P<0.05, \*\*P<0.01, \*\*\*P<0.001).

158

159 **Table S7. Results of analgesic activity:**

| Group | Basal reaction time (s) | Latency to reaction (s) |           |          |          |
|-------|-------------------------|-------------------------|-----------|----------|----------|
|       |                         | 15 min                  | 30 m      | 45 m     | 60 m     |
| I     | 3.5±0.5                 | 2.25±0.4                | 2.25±0.4  | 2.25±0.4 | 2.25±0.4 |
| II    | 3.5±0.5                 | 2.25±0.4                | 2.25±0.4  | 2.25±0.4 | 2.25±0.4 |
| III   | 3.5±0.5                 | 5±0.2                   | 8.75±0.25 | 12.5±1   | 13.5±1   |

|           |         |          |          |          |          |
|-----------|---------|----------|----------|----------|----------|
| <b>IV</b> | 3.5±0.5 | 4.75±1.7 | 6.25±0.4 | 8.75±0.4 | 8.75±0.7 |
|-----------|---------|----------|----------|----------|----------|

160

161

162

163

164 **5. The local anaesthetic assessment**

165 **Table S8. Results of local anaesthetic activity:**

| Gp         | BRT<br>(s) | Start of<br>anesthesia<br>(m) | Latency to Reaction(s) |         |         |         |         |          |         |          |
|------------|------------|-------------------------------|------------------------|---------|---------|---------|---------|----------|---------|----------|
|            |            |                               | At                     | At      | At      | At      | At      | At       | At      | At       |
|            |            |                               | 1 m                    | 2 m     | 3 m     | 15 m    | 30 m    | 1 h      | 2 h     | 3 h      |
| <b>I</b>   | 1.5±0.5    | -                             | 1.5±0.5                | 1.5±0.5 | 1.5±0.5 | 1.5±0.5 | 1.5±0.5 | 1.5±0.5  | 1.5±0.5 | 1.5±0.5  |
|            | 5          |                               | 0.5                    | 5       | 5       | 5       | 5       |          | 5       |          |
| <b>II</b>  | 1.5±0.5    | -                             | 1.5±0.5                | 1.5±0.5 | 1.5±0.5 | 1.5±0.5 | 1.5±0.5 | 1.5±0.5  | 1.5±0.5 | 1.5±0.5  |
|            | 5          |                               | 0.5                    | 5       | 5       | 5       | 5       |          | 5       |          |
| <b>III</b> | 1.5±0.5    | 1.5±0.5                       | 3.5±0.5                | 5.0±0.5 | 5.5±0.5 | 7.8±0.5 | 8.5±0.5 | 13±0.7   | 13±0.5  | 15.5±0.5 |
|            | 5          |                               | 0.5                    | 2       | 5       | 8       | 3       |          | 7       | 2        |
| <b>IV</b>  | 1.5±0.5    | 3.75±0.5                      | 4.7±0.5                | 4.7±0.5 | 5.5     | 8±1     | 8±1     | 10.5±0.5 | 6.4±0.5 | 4.8±0.2  |
|            | 5          |                               | 0.2                    | 2       |         |         |         | 5        | 2       |          |

166 **BRT** refers to Basal reaction time.

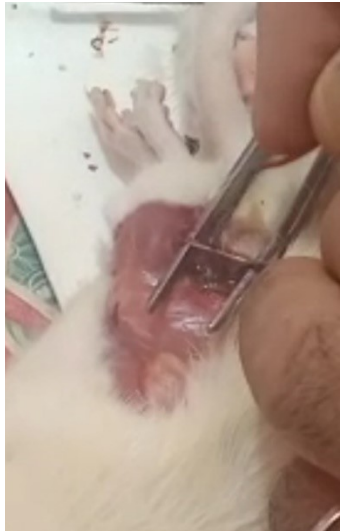

167

168 **Figure S6. Sciatic nerve isolation and local anaesthetic assessment**

## 169 **6. Network Pharmacology-Based Analysis of Ursolic Acid for Osteoarthritis**

### 170 • **Collection of ursolic acid related targets from herbal databases**

171 The target genes were obtained through a search within the Traditional Chinese Medicine  
172 Systems Pharmacology Database and Analysis Platform (TCMSP) database (<https://old.tcmsp->  
173 [e.com/index.php](https://old.tcmsp-e.com/index.php))<sup>31</sup>, BATMAN-TCM platform (<http://bionet.ncpsb.org.cn/batman-tcm/>)<sup>32</sup>.  
174 After that, and these target genes converted into their conical gene names using the UniProt  
175 database (<https://www.uniprot.org/>)<sup>33</sup>.

176

### 177 • **Screening of wound healing process related target genes**

178 Genes associated with osteoarthritis process were collected from the GeneCards database  
179 (<https://www.genecards.org/>)<sup>34</sup> and Comparative Toxicogenomics Database (CTD)  
180 (<http://ctdbase.org/>)<sup>35</sup> databases using the keywords "Osteoarthritis" and the species limited  
181 to "Homo sapiens". Duplicate targets were removed, and overlapping component-related and  
182 disease-related proteins were identified based on interactivenn (<http://www.interactivenn.net/>)  
183 <sup>36</sup> intersections as potential targets of these components in osteoarthritis process.

### 184 • **Protein–Protein Interaction (PPI) Network Construction**

185 A PPI network with STRING version 12.0 (<https://string-db.org/>)<sup>37</sup> was produced using a  
186 query list of target genes and exported to Cytoscape software version 3.10.0 (USA)<sup>38</sup>, a free

187 software package for visualizing, modeling, and analyzing molecular and genetic interaction  
 188 networks (confidence score = 0.400) and the top 10 important genes were screened using the  
 189 CytosHubba plug-in.

## 190 7. Molecular docking investigation

191 The X-ray crystallographic structure of TNF- $\alpha$  was co-crystallized with 6,7-Dimethyl-3-  
 192 [(methyl(2-[methyl((1-[3-(trifluoromethyl)phenyl]-1*H*-indol-3-yl)methyl) amino]ethyl)-  
 193 amino)methyl]-4*H*-chromen-4-one (PDB: 2AZ5, ligand ID: 307) obtained from the Protein  
 194 Data Bank (<https://www.rcsb.org/structure/2AZ5>). The X-ray crystallographic structure of  
 195 TGF- $\beta$ R1 (PDB: 1VJY) was acquired from the protein data bank  
 196 (<https://www.rcsb.org/structure/1VJY>)<sup>39</sup> and the native ligand naphthyridine (ligand ID: 460)  
 197 was redocked into the protein.

198 Moreover, docking of UA against NF- $\kappa$ B protein active site (PDB: 1SVC)  
 199 (<https://www.rcsb.org/structure/1SVC>) was performed [3]. Furthermore, docking against  
 200 Voltage Gated Sodium Channel (VGSC) was also performed, where VGSC Nav 1.4-1 complex  
 201 is one of the molecular targets for local anesthetics<sup>40</sup>, which has been previously identified to  
 202 have an active site as a cavity composed of four voltage-sensing domains (VSD-I to VSD-IV)  
 203 with six segments for each domain and with a resolution of 3.2 Å (PDB: 6AG)<sup>41</sup>. Regarding  
 204 docking against Matrix Metalloproteinase-9 (MMP-9), the active site (PDB: 4XCT) was  
 205 obtained from the protein data bank (<https://www.rcsb.org/structure/4xct>)<sup>42</sup>.

206 **Table S9: Molecular docking results and interacting residues for UA and co-crystallized**  
 207 **ligand in TNF- $\alpha$  (PDB: 2AZ5), TGF- $\beta$ R1 (PDB: 1VJY) and NF- $\kappa$ B (PDB: 1SVC) active**  
 208 **site**

| Active site                                           | Compound     | Glide score (kcal/mol) | Glide energy (kcal/mol) | Interacting Residues | Type of Interaction                |
|-------------------------------------------------------|--------------|------------------------|-------------------------|----------------------|------------------------------------|
| <b>TNF-<math>\alpha</math></b><br><b>(PDB: 2AZ5)</b>  | Ursolic acid | -2.85                  | -24.45                  | Leu120               | H-bond                             |
|                                                       | Ligand 307   | -4.68                  | -46.29                  | Tyr 119              | $\pi$ -cation                      |
| <b>TGF-<math>\beta</math>R1</b><br><b>(PDB: 1VJY)</b> | Ursolic acid | -3.04                  | -40.10                  | Glu 228<br>Lys 342   | 2 H-bond<br>H-bond,<br>Salt bridge |

|                                        |               |       |        |         |             |
|----------------------------------------|---------------|-------|--------|---------|-------------|
|                                        | Ligand 460    | -8.50 | -70.12 | His 283 | H-bond      |
|                                        |               |       |        | Asp 351 | H-bond      |
|                                        |               |       |        | Glu 245 | Salt bridge |
| <b>NF-<math>\kappa</math>B pathway</b> | Ursolic acid  | -3.36 | -37.78 | Lys 147 | Salt bridge |
|                                        |               |       |        | Lys 244 | H-bond      |
| <b>(PDB: 1SVC)</b>                     | Dexamethasone | -4.16 | -42.03 | Lys 52  | H-bond      |
|                                        |               |       |        | Gln 53  | H-bond      |
|                                        |               |       |        | Leu 251 | 2 H-bond    |
|                                        |               |       |        | Glu 341 | H-bond      |

209

210 **Table S10. Molecular docking results and interacting residues for UA and the co-**  
 211 **crystallized ligand (ID: N73) in MMP-9 (PDB: 4XCT) active site**

| Active site               | Compound          | Glide score<br>(kcal/mol) | Glide energy<br>(kcal/mol) | Interacting Residues | Type of Interaction                       |
|---------------------------|-------------------|---------------------------|----------------------------|----------------------|-------------------------------------------|
| <b>MMP-9 (PDB : 4XCT)</b> | Ursolic acid      | -3.00                     | -34.52                     | Gln 405              | H-bond                                    |
|                           |                   |                           |                            | Lys 1244             | H-bond                                    |
|                           | <b>Ligand N73</b> | -6.30                     | -69.13                     | Leu 188              | H-bond                                    |
|                           |                   |                           |                            | Ala 189              | H-bond                                    |
|                           |                   |                           |                            | His 226              | $\pi$ - $\pi$ stacking                    |
|                           |                   |                           |                            | Zn 302               | $\pi$ -cation and metal coordination bond |

212 **Table S11. Primers sequences used in qRT-PCR**

| Primer                        | Genbank accession no. | Sequence 5' to 3'                  |
|-------------------------------|-----------------------|------------------------------------|
| <i>IL-1<math>\beta</math></i> | NM_031512.2           | Forward GTG ATG AAA GAC GGC ACA CC |
|                               |                       | Reverse TCC TGG GGA AGG CAT TAG GA |
| <i>TGF-<math>\beta</math></i> | NM_021578.2           | Forward GCT GAA CCA AGG AGA CGG AA |



|                                |                |         |                             |
|--------------------------------|----------------|---------|-----------------------------|
|                                |                | Reverse | GAA GTT GGC ATG GTA GCC CT  |
| <i>TNF-<math>\alpha</math></i> | NM_012675.3    | Forward | CCT CTC TGC CAT CAA GAG CC  |
|                                |                | Reverse | GGC TGG GTA GAG AAC GGA TG  |
| <i>NF-<math>\kappa</math>B</i> | NM_001276711.2 | Forward | CAG CAG ATG GCC CAT ACC TT  |
|                                |                | Reverse | CTG TCA TCC GTG CTT CCA GT  |
| <i>COX-2</i>                   | NM_017232.4    | Forward | TTC GGG AGC ACA ACA GAG TG  |
|                                |                | Reverse | CAG CGG ATG CCA GTG ATA GA  |
| <i>MMP-9</i>                   | NM_031055.2    | Forward | GCA TCT GTA TGG TCG TGG CT  |
|                                |                | Reverse | CGT GCG GGC AAT AAG AAA GG  |
| <i>TIMP-1</i>                  | NM_053819.1    | Forward | CCT AGA GAC ACG CTA GAG CAG |
|                                |                | Reverse | ACC GGA AAC CTG TGG CAT TT  |
| <i>GAPDH</i>                   | NM_017008.4    | Forward | CTC TCT GCT CCT CCC TGT TC  |
|                                |                | Reverse | CGA CAT ACT CAG CAC CAG CA  |

213

214

215

## 216 References

- 217 1. E. M. Zahran, U. R. Abdelmohsen, A. Kolkeila, M. A. Salem, H. E. Khalil, S. Y. Desoukey, M. A.  
218 Fouad and M. S. Kamel, *Natural Product Research*, 2021, **35**, 5972-5976.
- 219 2. N. Babu, 2018.
- 220 3. N. Chirikova, D. Olennikov and A. Rokhin, *Chemistry of Natural Compounds*, 2008, **44**, 84-86.
- 221 4. D.-M.-C. Nguyen, D.-J. Seo, K.-Y. Kim, R.-D. Park, D.-H. Kim, Y.-S. Han, T.-H. Kim and W.-J.  
222 Jung, *Microbial Pathogenesis*, 2013, **59-60**, 52-59.
- 223 5. A. Suzuki, O. Shirota, K. Mori, S. Sekita, H. Fuchino, A. Takano and M. Kuroyanagi, *Chemical  
224 and Pharmaceutical Bulletin*, 2009, **57**, 245-251.
- 225 6. E. M. Zahran, U. R. Abdelmohsen, H. E. Khalil, S. Y. Desoukey, M. A. Fouad and M. S. Kamel,  
226 *Phytochemistry Reviews*, 2020, **19**, 907-953.
- 227 7. N. Z. Z. Mamadalieva, D. K. K. Akramov, L. A. A. Wessjohann, H. Hussain, C. Long, K. S. S.  
228 Tojibaev, E. Alshammari, M. L. L. Ashour and M. Wink, *Plants (Basel)*, 2021, **10**, 132.

- 229 8. A. Karioti, T. Milošević-Ifantis, N. Pachopos, N. Niryiannaki, D. Hadjipavlou-Litina and H.  
230 Skaltsa, *Journal of enzyme inhibition and medicinal chemistry*, 2015, **30**, 38-43.
- 231 9. Y. A. N. Y.-m. C. Y.-x. Li Xiao-zhen, *NATURAL PRODUCT RESEARCH AND DEVELOPMENT*, 2017,  
232 **29**, 183-189.
- 233 10. A. Hadipanah, M. Gheisari and A. Armin, *Scientia Agriculturae*, 2013, **4**, 55-57.
- 234 11. H. KÜHN, R. WIESNER, L. ALDER and T. SCHEWE, *European journal of biochemistry*, 1989,  
235 **186**, 155-162.
- 236 12. C. Garcia, C. Teodósio, C. Oliveira, C. Oliveira, A. Díaz-Lanza, C. Reis, N. Duarte and P. Rijo,  
237 *Current pharmaceutical design*, 2018, **24**, 4207-4236.
- 238 13. R. Pereda-Miranda, L. Hernández, M. J. Villavicencio, M. Novelo, P. Ibarra, H. Chai and J. M.  
239 Pezzuto, *Journal of Natural Products*, 1993, **56**, 583-593.
- 240 14. A. El-Lakany, *Natural Product Sciences*, 2003, **9**, 220-222.
- 241 15. B. Abegaz and H. Kinfe, *Natural Product Communications*, 2019, **14**, 1934578X1984581.
- 242 16. S. N. Ebrahimi, S. Zimmermann, J. Zaugg, M. Smiesko, R. Brun and M. Hamburger, *Planta*  
243 *medica*, 2013, **29**, 150-156.
- 244 17. M. Villalva, S. Santoyo, L. Salas-Pérez, M. d. I. N. Siles-Sánchez, M. Rodríguez García-Risco, T.  
245 Fornari, G. Reglero and L. Jaime, *Foods*, 2021, **10**, 2067.
- 246 18. Y. Yin, K. Zhang, L. Wei, D. Chen, Q. Chen, M. Jiao, X. Li, J. Huang, Z. Gong and N. Kang,  
247 *Frontiers in pharmacology*, 2021, **12**.
- 248 19. Y. Tang, M. Wang, X. Le, J. Meng, L. Huang, P. Yu, J. Chen and P. Wu, *Antioxidant and*  
249 *cardioprotective effects of Danshensu (3-(3, 4-dihydroxyphenyl)-2-hydroxy-propanoic acid*  
250 *from Salvia miltiorrhiza) on isoproterenol-induced myocardial hypertrophy in rats*, 2011.
- 251 20. M. Silva, I. Vieira, F. Mendes, I. Albuquerque, R. Santos, F. Silva and S. Morais, *Molecules*  
252 *(Basel, Switzerland)*, 2008, **13**, 2482-2487.
- 253 21. P. Nahak, G. Karmakar, P. Chettri, B. Roy, P. Guha, S. E. Besra, A. Soren, A. G. Bykov, A. V.  
254 Akentiev and B. A. J. L. Noskov, 2016, **32**, 9816-9825.
- 255 22. M. Gallarate, E. Mittone, M. E. Carlotti, M. Trotta, P. J. J. o. d. s. Piccerelle and technology,  
256 2009, **30**, 823-833.
- 257 23. S. A. Fouad, E. B. Basalious, M. A. El-Nabarawi and S. A. Tayel, *International journal of*  
258 *pharmaceutics*, 2013, **453**, 569-578.
- 259 24. S. A. Mohamad, E. M. Zahran, M. R. Abdel Fadeel, A. Albohy and M. A. Safwat, *Int J*  
260 *Nanomedicine*, 2021, **16**, 1789-1804.
- 261 25. N. K. Thakur, P. Bharti, S. Mahant and R. Rao, *Scientia Pharmaceutica*, 2012, **80**, 1045-1060.
- 262 26. S. A. Mohamad, H. Salem, H. A. Yassin and H. F. Mansour, *Drug Design, Development and*  
263 *Therapy*, 2020, **14**, 4277.
- 264 27. M. Yu, Yuan, W., Li, D., Schwendeman, A., & Schwendeman, S. P. (2019). Predicting drug  
265 release kinetics from nanocarriers inside dialysis bags. *Journal of Controlled Release*, 315,  
266 23-30..
- 267 28. M. P. Paarakh, Jose, P. A., Setty, C. M., & Christoper, G. P. (2018). Release kinetics–concepts  
268 and applications. *Int J Pharm Res Technol*, 8(1), 12-20..
- 269 29. E. M. Zahran, U. R. Abdelmohsen, A. T. Ayoub, M. A. Salem, H. E. Khalil, S. Y. Desoukey, M. A.  
270 Fouad and M. S. Kamel, *South African Journal of Botany*, 2020, **131**, 311-319.
- 271 30. J. R. Deuis, L. S. Dvorakova and I. Vetter, *Frontiers in Molecular Neuroscience*, 2017, **10**.
- 272 31. J. Ru, P. Li, J. Wang, W. Zhou, B. Li, C. Huang, P. Li, Z. Guo, W. Tao, Y. Yang, X. Xu, Y. Li, Y.  
273 Wang and L. Yang, *J Cheminform*, 2014, **6**, 13.
- 274 32. Z. Liu, F. Guo, Y. Wang, C. Li, X. Zhang, H. Li, L. Diao, J. Gu, W. Wang, D. Li and F. He, *Sci Rep*,  
275 2016, **6**, 21146.
- 276 33. C. UniProt, *Nucleic Acids Res*, 2021, **49**, D480-D489.
- 277 34. S. Fishilevich, R. Nudel, N. Rappaport, R. Hadar, I. Plaschkes, T. Iny Stein, N. Rosen, A. Kohn,  
278 M. Twik, M. Safran, D. Lancet and D. Cohen, *Database (Oxford)*, 2017, **2017**.

- 279 35. A. P. Davis, T. C. Wieggers, J. Wieggers, B. Wyatt, R. J. Johnson, D. Sciaky, F. Barkalow, M.  
280 Strong, A. Planchart and C. J. Mattingly, *Toxicol Sci*, 2023, DOI: 10.1093/toxsci/kfad069.
- 281 36. H. Heberle, G. V. Meirelles, F. R. da Silva, G. P. Telles and R. Minghim, *BMC Bioinformatics*,  
282 2015, **16**, 169.
- 283 37. D. Szklarczyk, R. Kirsch, M. Koutrouli, K. Nastou, F. Mehryary, R. Hachilif, A. L. Gable, T. Fang,  
284 N. T. Doncheva, S. Pyysalo, P. Bork, L. J. Jensen and C. von Mering, *Nucleic Acids Res*, 2023,  
285 **51**, D638-D646.
- 286 38. P. Shannon, A. Markiel, O. Ozier, N. S. Baliga, J. T. Wang, D. Ramage, N. Amin, B. Schwikowski  
287 and T. Ideker, *Genome Res*, 2003, **13**, 2498-2504.
- 288 39. F. Gellibert, J. Woolven, M. H. Fouchet, N. Mathews, H. Goodland, V. Lovegrove, A. Laroze, V.  
289 L. Nguyen, S. Sautet, R. Wang, C. Janson, W. Smith, G. Krysa, V. Boullay, A. C. De Gouville, S.  
290 Huet and D. Hartley, *J Med Chem*, 2004, **47**, 4494-4506.
- 291 40. E. M. Zahran, U. R. Abdelmohsen, M. M. Shalash, M. A. Salem, H. E. Khalil, S. Y. Desoukey, M.  
292 A. Fouad, M. Krischke, M. Mueller and M. S. Kamel, *Natural product research*, 2020, 1-7.
- 293 41. X. Pan, Z. Li, Q. Zhou, H. Shen, K. Wu, X. Huang, J. Chen, J. Zhang, X. Zhu and J. J. S. Lei, 2018,  
294 **362**.
- 295 42. E. Nuti, A. R. Cantelmo, C. Gallo, A. Bruno, B. Bassani, C. Camodeca, T. Tuccinardi, L. Vera, E.  
296 Orlandini and S. J. J. o. m. c. Nencetti, 2015, **58**, 7224-7240.
- 297
